# Supplementary material for: Genetic Variations in Plasma Circulating DNA of HBV-Related Hepatocellular Carcinoma Patients Predict Recurrence after Liver Transplantation
Source: PLOS journal article supplement (doi:10.1371/journal.pone.0026003), 2011-10-05
Supplement: S4 (10.1371/journal.pone.0026003.s004) [file journal.pone.0026003.s004]

| **Table S1.** Clinicopathological characteristics of three cohorts of HCC patients. | | | | | | | | | |
| --- | --- | --- | --- | --- | --- | --- | --- | --- | --- |
| Clinicopathological characteristics | | Discovery Set (n=30) | |  | Training Set (n=102) | |  | Validation Set (n=77) | |
| n | % |  | n | % |  | n | % |
| Gender | Male | 29 | 96.7 |  | 96 | 94.1 |  | 69 | 89.6 |
|  | Female | 1 | 3.3 |  | 6 | 5.9 |  | 8 | 10.4 |
| Age | <50 years | 16 | 53.3 |  | 50 | 49.0 |  | 41 | 53.2 |
|  | ≥50 years | 14 | 46.7 |  | 52 | 51.0 |  | 36 | 46.8 |
| Child-Pugh Class* | A | 14 | 46.7 |  | 55 | 53.9 |  | 39 | 50.6 |
|  | B/C | 16 | 53.3 |  | 47 | 46.1 |  | 38 | 49.4 |
| AFP | ≤200 ng/ml | 17 | 56.7 |  | 57 | 55.9 |  | 44 | 57.1 |
|  | >200 ng/ml | 13 | 43.3 |  | 45 | 44.1 |  | 33 | 42.9 |
| Pre-LT treatment | No | 17 | 56.7 |  | 63 | 61.8 |  | 39 | 50.6 |
|  | Yes | 13 | 43.3 |  | 39 | 38.2 |  | 38 | 49.4 |
| Tumor size | ≤5 cm | 15 | 50.0 |  | 47 | 46.1 |  | 40 | 51.9 |
|  | >5 cm | 15 | 50.0 |  | 55 | 53.9 |  | 37 | 48.1 |
| Tumor number | Single | 12 | 40.0 |  | 46 | 45.1 |  | 31 | 40.3 |
|  | Multiple | 18 | 60.0 |  | 56 | 54.9 |  | 46 | 59.7 |
| Encapsulation | Complete | 14 | 46.7 |  | 52 | 51.0 |  | 34 | 44.2 |
| Differentiation* | None | 16 | 53.3 |  | 50 | 49.0 |  | 43 | 55.8 |
| Differentiation | I/II | 19 | 63.3 |  | 60 | 58.8 |  | 50 | 64.9 |
|  | III/IV | 11 | 36.7 |  | 42 | 41.2 |  | 27 | 35.1 |
| Microvessel Invasion | No | 15 | 50.0 |  | 46 | 45.1 |  | 44 | 57.1 |
|  | Yes | 15 | 50.0 |  | 56 | 54.9 |  | 33 | 42.9 |
| Milan criteria | Yes | 13 | 43.3 |  | 47 | 46.1 |  | 34 | 44.2 |
|  | No | 17 | 56.7 |  | 55 | 53.9 |  | 43 | 55.8 |
| Abbreviations: AFP, alpha-fetoprotein; LT, liver transplantation. | | | | | | | | | |
