# Supplementary material for: Genetic Variations in Plasma Circulating DNA of HBV-Related Hepatocellular Carcinoma Patients Predict Recurrence after Liver Transplantation
Source: PLOS journal article supplement (doi:10.1371/journal.pone.0026003), 2011-10-05
Supplement: S11 (10.1371/journal.pone.0026003.s011) [file journal.pone.0026003.s011]

| **Table S8.** Clinicopathological characteristics of HCC patients beyond Milan criteria. | | | |
| --- | --- | --- | --- |
| Clinicopathological characteristics | | n | % |
| Gender | Male | 105 | 91.3 |
|  | Female | 10 | 8.7 |
| Age | <50 years | 61 | 53.0 |
|  | ≥50 years | 54 | 47.0 |
| Child-Pugh Class* | A | 51 | 44.3 |
|  | B/C | 64 | 55.7 |
| AFP | ≤200 ng/ml | 56 | 48.7 |
|  | >200 ng/ml | 59 | 51.3 |
| Pre-LT treatment | No | 51 | 44.3 |
|  | Yes | 64 | 55.7 |
| Encapsulation | Complete | 54 | 47.0 |
|  | None | 61 | 53.0 |
| Differentiation | I/II | 64 | 55.7 |
|  | III/IV | 51 | 44.3 |
| Microvessel Invasion | No | 47 | 40.9 |
| Differentiation* | Yes | 68 | 59.1 |
| Tumor size (cm) | ≤5 | 18 | 15.7 |
|  | ＞5 | 97 | 84.3 |
|  | Median (7.0) |  |  |
| Tumor number | 1 | 25 | 21.7 |
|  | 2 | 18 | 15.7 |
|  | ≥3 | 72 | 62.6 |
|  | Median (3) |  |  |
| Abbreviations: AFP, alpha-fetoprotein; LT, liver transplantation.  There was no patient with macrovascular invasion in the present study. | | | |
